# Supplementary material
Source: PubMed Central journal article supplement (PMC5214573)
Supplement: NIHMS838263-supplement-Supplemental.pdf [file NIHMS838263-supplement-Supplemental.pdf]

Supplemental Table 1: Taxa showing significant differences among the cohort groups using DESeq2 analysis.

| <b>Controls Compared fCDI</b> |                        |                         |
|-------------------------------|------------------------|-------------------------|
|                               | <b>Taxonomic Level</b> | <b>Adjusted p-value</b> |
| <b>Higher in Controls</b>     |                        |                         |
| Asaccharobacter               | genus                  | <b>0.001010093</b>      |
| Collinsella                   | genus                  | <b>2.28E-07</b>         |
| Coriobacteriaceae             | family                 | <b>0.001446745</b>      |
| Barnesiella                   | genus                  | <b>0.001820101</b>      |
| Prevotellaceae                | family                 | <b>0.045160392</b>      |
| Bacteroidales                 | order                  | <b>0.006587203</b>      |
| Anaerostipes                  | genus                  | <b>1.94E-11</b>         |
| Clostridium_XIVb              | genus                  | <b>0.035027962</b>      |
| Coprococcus                   | genus                  | <b>2.85E-11</b>         |
| Dorea                         | genus                  | <b>0.006049567</b>      |
| Pseudobutyrvibrio             | genus                  | <b>0.001693646</b>      |
| Roseburia                     | genus                  | <b>3.10E-07</b>         |
| Lachnospiraceae               | family                 | <b>0.068095429</b>      |
| Clostridium_IV                | genus                  | <b>0.088374326</b>      |
| Faecalibacterium              | genus                  | <b>0.019262066</b>      |
| Ruminococcus                  | genus                  | <b>3.98E-09</b>         |
| Ruminococcaceae               | family                 | <b>0.008294786</b>      |
| Clostridiales                 | Order                  | <b>3.34E-06</b>         |
| Turicibacter                  | genus                  | <b>0.02607887</b>       |
| Erysipelotrichaceae           | family                 | <b>0.000101813</b>      |
| Phascolarctobacterium         | genus                  | <b>0.0001296</b>        |
| Acidaminococcaceae            | family                 | <b>0.009621216</b>      |
| Firmicutes                    | phylum                 | <b>1.84E-07</b>         |
| Alphaproteobacteria           | class                  | <b>0.003072667</b>      |
| Betaproteobacteria            | class                  | <b>0.067949259</b>      |
| Pasteurellaceae               | family                 | <b>0.009651848</b>      |
| Akkermansia                   | genus                  | <b>0.010595299</b>      |
|                               |                        |                         |
| <b>Higher in fCDI</b>         |                        |                         |
| Methanobrevibacter            | genus                  | <b>4.89E-05</b>         |
| Bacteroidetes                 | phylum                 | <b>3.41E-06</b>         |
| Gemella                       | genus                  | <b>0.000796493</b>      |
| Staphylococcus                | genus                  | <b>0.000419077</b>      |

|                                  |        |                    |
|----------------------------------|--------|--------------------|
| Enterococcus                     | genus  | <b>3.58E-17</b>    |
| Lactobacillus                    | genus  | <b>0.000247622</b> |
| Anaerococcus                     | genus  | <b>0.089911946</b> |
| Eubacteriaceae                   | family | <b>0.061768263</b> |
| Clostridium_XIVa                 | genus  | <b>0.006119287</b> |
| Clostridium_XI                   | genus  | <b>0.053097977</b> |
| Anaerotruncus                    | genus  | <b>0.007593418</b> |
| Subdoligranulum                  | genus  | <b>0.000352895</b> |
| Acidaminococcus                  | genus  | <b>0.007314414</b> |
| Megamonas                        | genus  | <b>0.03507509</b>  |
| Veillonella                      | genus  | <b>3.31E-06</b>    |
| Fusobacterium                    | genus  | <b>4.70E-07</b>    |
| Burkholderiales                  | order  | <b>0.003154702</b> |
| Desulfovibrio                    | genus  | <b>0.009651848</b> |
| Enterobacteriaceae               | family | <b>0.01449686</b>  |
| Pyramidobacter                   | genus  | <b>0.013483575</b> |
| TM7_genus_incertae_sedis         | genus  | <b>0.042975897</b> |
| <b>Controls Compared to rCDI</b> |        |                    |
| <b>Higher in Control</b>         |        |                    |
| Methanobrevibacter               | genus  | <b>0.035319197</b> |
| Asaccharobacter                  | genus  | <b>0.009155028</b> |
| Collinsella                      | genus  | <b>2.91E-05</b>    |
| Eggerthella                      | genus  | <b>0.056433765</b> |
| Coriobacteriaceae                | family | <b>4.11E-05</b>    |
| Bacteroides                      | genus  | <b>0.045160392</b> |
| Barnesiella                      | genus  | <b>0.000196</b>    |
| Butyricimonas                    | genus  | <b>0.00053362</b>  |
| Odoribacter                      | genus  | <b>8.20E-07</b>    |
| Parabacteroides                  | genus  | <b>8.16E-07</b>    |
| Alistipes                        | genus  | <b>2.14E-18</b>    |
| Clostridium_sensu_stricto        | genus  | <b>0.051136343</b> |
| Anaerostipes                     | genus  | <b>1.28E-14</b>    |
| Blautia                          | genus  | <b>0.009160824</b> |
| Clostridium_XIVa                 | genus  | <b>0.088374326</b> |
| Clostridium_XIVb                 | genus  | <b>1.17E-08</b>    |
| Coprococcus                      | genus  | <b>1.08E-14</b>    |
| Dorea                            | genus  | <b>0.000387117</b> |
| Lachnospiracea_incertae_sedis    | genus  | <b>1.69E-05</b>    |
| Pseudobutyrvibrio                | genus  | <b>0.006542324</b> |
| Roseburia                        | genus  | <b>3.86E-05</b>    |

|                       |        |                    |
|-----------------------|--------|--------------------|
| Lachnospiraceae       | family | <b>8.07E-05</b>    |
| Clostridium_XI        | genus  | <b>0.078180456</b> |
| Butyricoccus          | genus  | <b>0.005184213</b> |
| Clostridium_IV        | genus  | <b>1.41E-12</b>    |
| Faecalibacterium      | genus  | <b>0.001730092</b> |
| Flavonifractor        | genus  | <b>0.001452964</b> |
| Oscillibacter         | genus  | <b>5.46E-09</b>    |
| Ruminococcus          | genus  | <b>2.41E-10</b>    |
| Sporobacter           | genus  | <b>0.002415051</b> |
| Ruminococcaceae       | family | <b>2.15E-05</b>    |
| Clostridiales         | order  | <b>2.66E-13</b>    |
| Clostridia            | class  | <b>0.015509886</b> |
| Coprobacillus         | genus  | <b>0.060667481</b> |
| Erysipelotrichaceae   | family | <b>1.40E-05</b>    |
| Phascolarctobacterium | genus  | <b>0.036980555</b> |
| Firmicutes            | phylum | <b>2.74E-13</b>    |
| Alphaproteobacteria   | class  | <b>0.005710105</b> |
| Oxalobacteraceae      | family | <b>0.087091276</b> |
| Parasutterella        | genus  | <b>0.033727006</b> |
| Pasteurellaceae       | family | <b>0.009651848</b> |
| Anaeroplasma          | genus  | <b>0.009363913</b> |
| Bacteria;unclassified | domain | <b>1.09E-06</b>    |
| Akkermansia           | genus  | <b>0.002324539</b> |
|                       |        |                    |
| <b>Higher in rCDI</b> |        |                    |
| Actinomyces           | genus  | <b>0.003916282</b> |
| Atopobium             | genus  | <b>0.00200702</b>  |
| Prevotella            | genus  | <b>1.22E-08</b>    |
| Abiotrophia           | genus  | <b>0.010077468</b> |
| Enterococcus          | genus  | <b>3.96E-12</b>    |
| Lactobacillus         | genus  | <b>1.75E-15</b>    |
| Pediococcus           | genus  | <b>0.000146118</b> |
| Lactobacillaceae      | family | <b>0.001010093</b> |
| Lactococcus           | genus  | <b>0.076885097</b> |
| Lactobacillales       | order  | <b>1.02E-05</b>    |
| Oribacterium          | genus  | <b>0.00059166</b>  |
| Catenibacterium       | genus  | <b>0.091508083</b> |
| Acidaminococcus       | genus  | <b>0.00028368</b>  |
| Anaeroglobus          | genus  | <b>0.026082477</b> |
| Megamonas             | genus  | <b>0.086470202</b> |

|                               |        |                    |
|-------------------------------|--------|--------------------|
| Veillonellaceae               | family | <b>1.13E-10</b>    |
| Veillonella                   | genus  | <b>1.08E-14</b>    |
| Fusobacterium                 | genus  | <b>1.13E-10</b>    |
| Fusobacteriaceae              | family | <b>0.058216139</b> |
| Leptotrichia                  | genus  | <b>0.035548366</b> |
| Microvirgula                  | genus  | <b>2.62E-05</b>    |
| Neisseriaceae                 | family | <b>2.09E-05</b>    |
| Desulfovibrio                 | genus  | <b>0.009651848</b> |
| Campylobacter                 | genus  | <b>8.07E-05</b>    |
| Morganella                    | genus  | <b>1.13E-10</b>    |
| Proteus                       | genus  | <b>8.16E-07</b>    |
| Enterobacteriaceae            | family | <b>7.26E-10</b>    |
| <b>fCDI compared to rCDI</b>  |        |                    |
| <b>Higher in fCDI</b>         |        |                    |
| Methanobrevibacter            | genus  | <b>8.03E-10</b>    |
| Bacteria;AEggerthella         | genus  | <b>0.04293734</b>  |
| Bacteroides                   | genus  | <b>0.078621197</b> |
| Butyricimonas                 | genus  | <b>1.85E-05</b>    |
| Odoribacter                   | genus  | <b>4.11E-05</b>    |
| Parabacteroides               | genus  | <b>1.03E-08</b>    |
| Alistipes                     | genus  | <b>2.54E-13</b>    |
| Bacteroidetes                 | phylum | <b>4.46E-07</b>    |
| Gemella                       | genus  | <b>0.035548366</b> |
| Staphylococcus                | genus  | <b>0.002407477</b> |
| Clostridium_sensu_stricto     | genus  | <b>0.000149739</b> |
| Clostridium_XIVa              | genus  | <b>3.41E-06</b>    |
| Clostridium_XIVb              | genus  | <b>0.000665842</b> |
| Lachnospiracea_incertae_sedis | genus  | <b>0.001010093</b> |
| Lachnospiraceae               | family | <b>0.067102654</b> |
| Clostridium_XI                | genus  | <b>9.31E-05</b>    |
| Anaerotruncus                 | genus  | <b>0.002776403</b> |
| Clostridium_IV                | genus  | <b>2.50E-07</b>    |
| Flavonifractor                | genus  | <b>1.09E-06</b>    |
| Oscillibacter                 | genus  | <b>3.16E-07</b>    |
| Sporobacter                   | genus  | <b>0.057568121</b> |
| Subdoligranulum               | genus  | <b>4.39E-07</b>    |
| Clostridiales                 | order  | <b>0.014134195</b> |
| Firmicutes                    | phylum | <b>0.036250203</b> |
| Burkholderiales               | order  | <b>3.49E-05</b>    |
| Desulfovibrionales            | order  | <b>0.044252578</b> |

|                       |        |                    |
|-----------------------|--------|--------------------|
| Cloacibacillus        | genus  | <b>0.078180456</b> |
| Pyramidobacter        | genus  | <b>0.043466053</b> |
| Anaeroplasm           | genus  | <b>0.027283946</b> |
|                       |        |                    |
| <b>Higher in rCDI</b> |        |                    |
| Actinomyces           | genus  | <b>0.009962328</b> |
| Atopobium             | genus  | <b>0.036761739</b> |
| Prevotella            | genus  | <b>2.09E-08</b>    |
| Lactobacillus         | genus  | <b>3.62E-05</b>    |
| Pediococcus           | genus  | <b>0.000134328</b> |
| Lactobacillaceae      | family | <b>0.000133636</b> |
| Lactococcus           | genus  | <b>0.003862545</b> |
| Lactobacillales       | order  | <b>0.004384771</b> |
| Oribacterium          | genus  | <b>0.033048728</b> |
| Catenibacterium       | genus  | <b>0.092841286</b> |
| Acidaminococcaceae    | family | <b>0.050294454</b> |
| Veillonellaceae       | family | <b>1.55E-09</b>    |
| Veillonella           | genus  | <b>0.004462161</b> |
| Fusobacteriaceae      | family | <b>0.046977027</b> |
| Leptotrichia          | genus  | <b>0.063885526</b> |
| Microvirgula          | genus  | <b>2.62E-05</b>    |
| Neisseriaceae         | family | <b>0.000226356</b> |
| Campylobacter         | genus  | <b>0.0001584</b>   |
| Morganella            | genus  | <b>7.26E-10</b>    |
| Proteus               | genus  | <b>2.81E-05</b>    |
| Enterobacteriaceae    | family | <b>0.000638747</b> |

Supplemental Table 2. Taxonomic classification results for the OTUs listed in Table 3. For each OTU, the possible placements reported by pplacer (10) to a reference tree generated using full-length or near full-length 16S rDNA sequences of type strains are listed. Likelihood weight ratios (LWR) approximate the posterior probability of the attachment of the sample to an edge of the tree. Only placements with LWR > 0.1 are shown for brevity.

| OTU      | Taxonomic level | Identification                    | LWR   |
|----------|-----------------|-----------------------------------|-------|
| Otu00002 | species         | <i>Bacteroides dorei</i>          | 1.0   |
| Otu00007 | species         | <i>Eubacterium rectale</i>        | 0.946 |
| Otu00008 | species         | <i>Blautia wexlerae</i>           | 1.0   |
| Otu00011 | genus           | <i>Bifidobacterium</i>            | 0.496 |
| Otu00011 | species         | <i>Bifidobacterium dentium</i>    | 0.504 |
| Otu00016 | species         | <i>Parabacteroides distasonis</i> | 1.0   |

|          |         |                                      |       |
|----------|---------|--------------------------------------|-------|
| Otu00017 | species | <i>Akkermansia muciniphila</i>       | 1.0   |
| Otu00018 | species | <i>Ruminococcus bromii</i>           | 1.0   |
| Otu00021 | family  | Lachnospiraceae                      | 0.811 |
| Otu00021 | genus   | <i>Blautia</i>                       | 0.159 |
| Otu00035 | species | <i>Blautia luti</i>                  | 0.976 |
| Otu00134 | species | <i>Eubacterium coprostanoligenes</i> | 0.967 |
